# Supplementary material
Source: PubMed Central journal article supplement (PMC10527981)
Supplement: NIHMS1923380-supplement-1.pdf [file NIHMS1923380-supplement-1.pdf]

## Figure S1

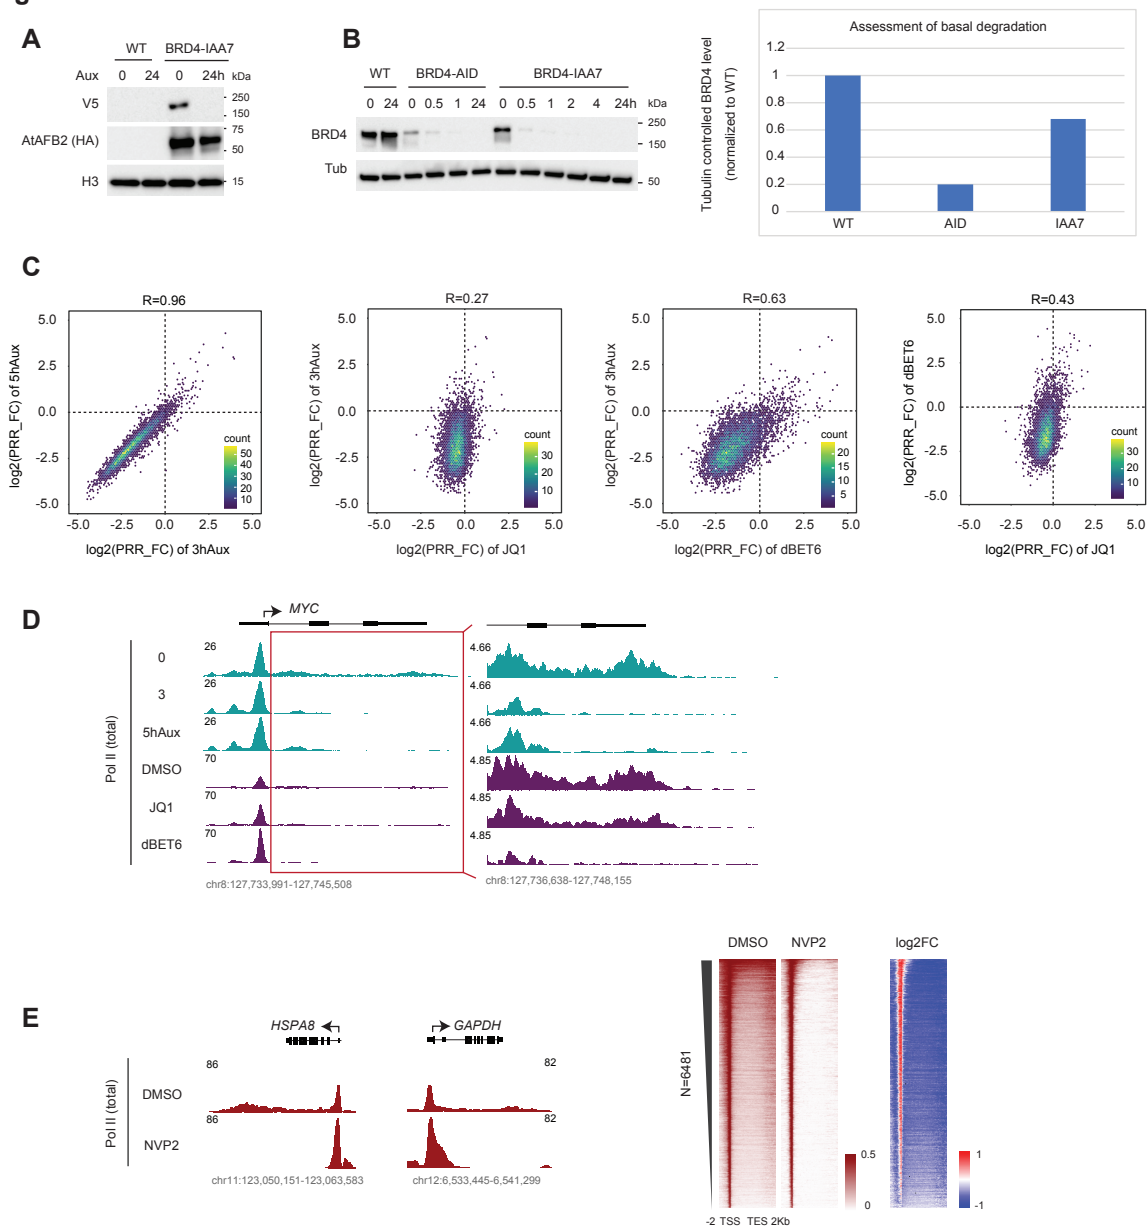

**Figure S1. Differences in Pol II pausing induced by BRD4 depletion and bromodomain inhibition, related to Figure 1**

- Western blot showing the expression of HA-tagged AtAFB2 and the auxin-induced degradation of V5-tagged BRD4 using anti-tag antibodies.
- Western blot comparing the BRD4 protein expression level and degradation kinetics of the previously published BRD4-AID decon<sup>12</sup> to those of the BRD4-IAA7 decon used in this study (left). Basal degradation of the BRD4 protein in the two systems were assessed by comparison of the percentage of the tubulin-normalized protein level relative to WT in each group (right). Note: in Figures S1A and S1B, the BRD4-IAA7 clone used is D4 (Hygromycin selected); it is G3 (Neomycin selected) otherwise in the study.
- Scatter plot of the gene-by-gene PRR correlations between auxin treatment durations and between JQ1 and auxin, dBET6 and auxin, or JQ1 and dBET6 treatment (normalized to corresponding vehicles).
- Track examples of Pol II ChIP-seq signal at the MYC locus upon auxin treatment (0, 3 or 5h), JQ1 or dBET6 treatment (3h) with a zoom-in view at the gene body.
- Track examples of Pol II ChIP-seq signal at the HSPA8 and GAPDH loci upon NVP-2 treatment (2h) and corresponding heatmaps showing Pol II occupancy profiles and fold change in occupancy vs control upon NVP-2 treatment.

**Figure S2**

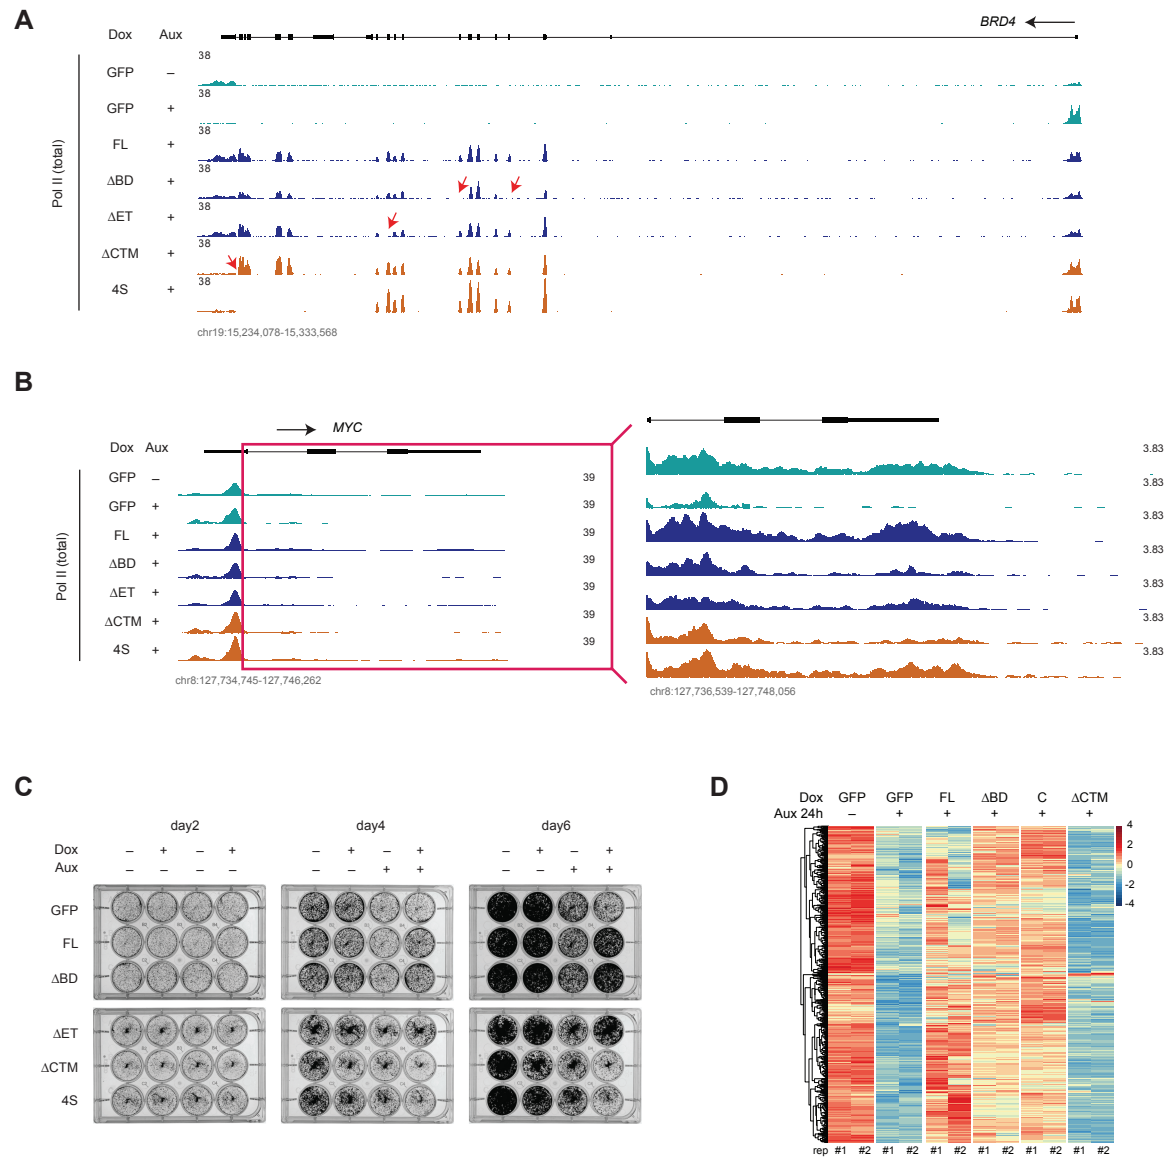

**Figure S2. BRD4 depletion and rescue by different mutants, related to Figure 2**

- Tracks of the total Pol II ChIP-seq signal at the BRD4 gene locus in the rescue experiment with the arrows indicating the loss of exonic signal corresponding to mutant sequence.
- Tracks of the total Pol II ChIP-seq signal at the MYC gene locus as well as the genebody zoom in for different mutant rescue upon auxin treatment.
- Plate images showing cell growth over the time course of BRD4 depletion and mutant complementation.
- RNA-seq  $\log_2(x+1)$  scaled counts (UQ-corrected) reveal a subset of genes (N=863) that were rescued by bromodomain-less BRD4 mutants but not the  $\Delta$ CTM mutant upon depletion of endogenous BRD4 for 24h.



**Figure S4**

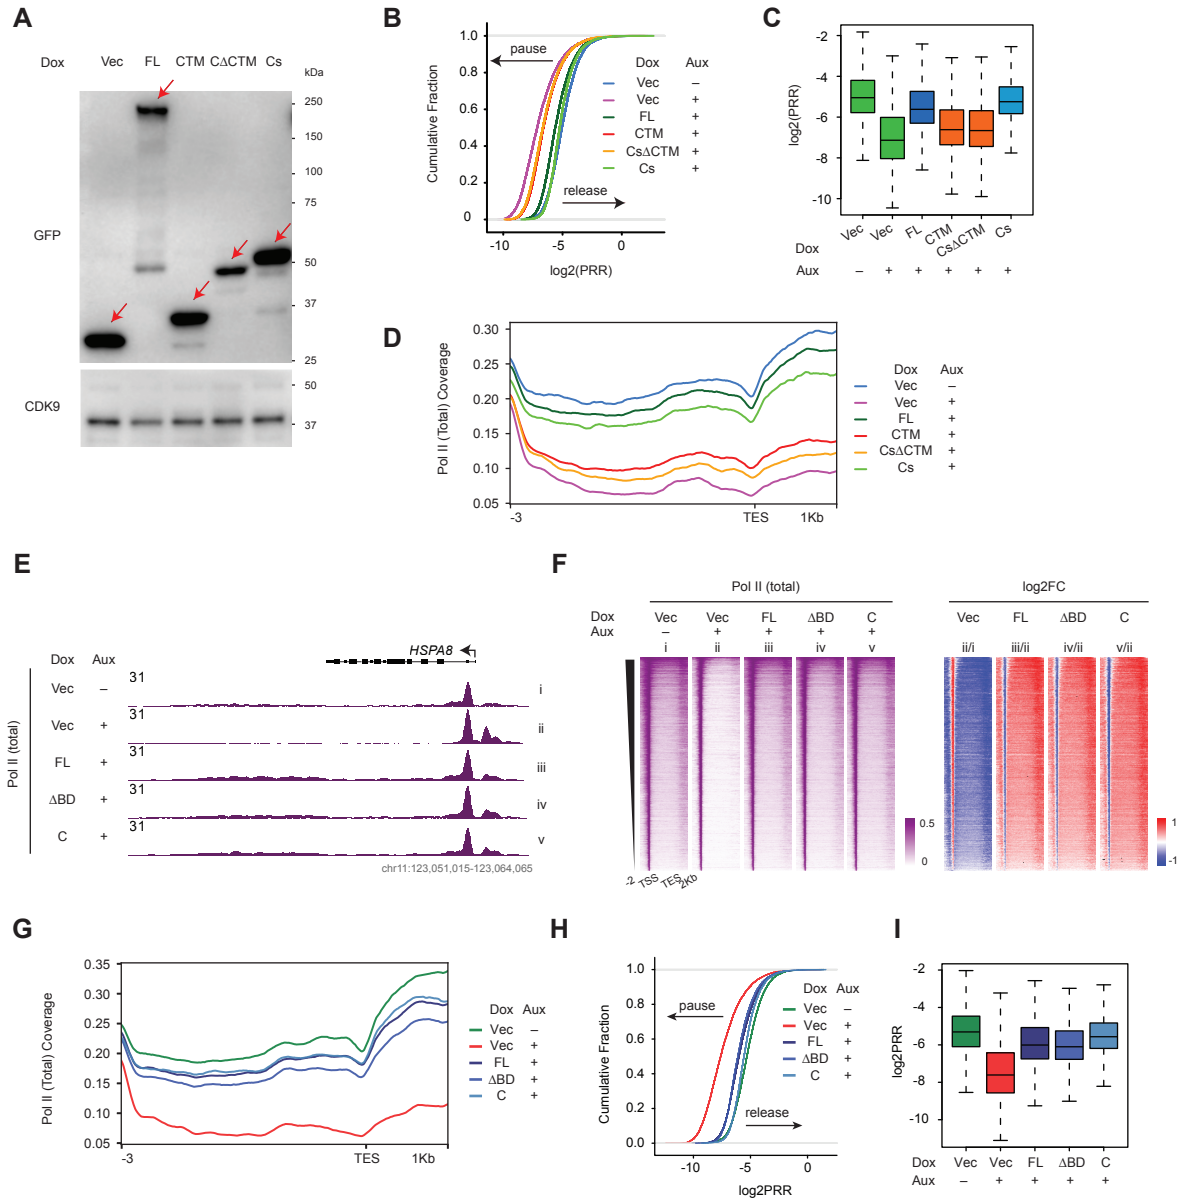

**Figure S4. BRD4 C terminal fragments interact with PTEFb and release paused Pol II, related to Figure 4**

- A. Western blot showing the expression of GFP-tagged FL BRD4 or the CTM, Cs $\Delta$ CTM or Cs mutant constructs upon Dox induction (2d.) (Vector: TetOn-NLS-GFP).
- B. ECDF showing the log<sub>2</sub>PRR from the Pol II ChIP-seq for the rescue experiment in Figure 4E.
- C. Boxplot showing the log<sub>2</sub>PRR from the Pol II ChIP-seq for the rescue experiment in Figure 4E.
- D. Metagene plot showing Pol II occupancy around the TES as a reference point, for the Pol II ChIP-seq conditions in Figure 4E.
- E. Track examples showing the total Pol II ChIP-seq signal for BRD4 depletion and rescue with indicated mutants.
- F. Heatmap showing the genome-wide Pol II occupancy profiles and the corresponding fold changes for the conditions in E.
- G. Metagene plot showing the Pol II occupancy profile, around the TES as a reference point, from the Pol II ChIP-seq for conditions in E.
- H. ECDF showing the log<sub>2</sub>PRR from the Pol II ChIP-seq for conditions in E.
- I. Boxplot showing the log<sub>2</sub>PRR from the Pol II ChIP-seq for conditions in E.

**Figure S5**

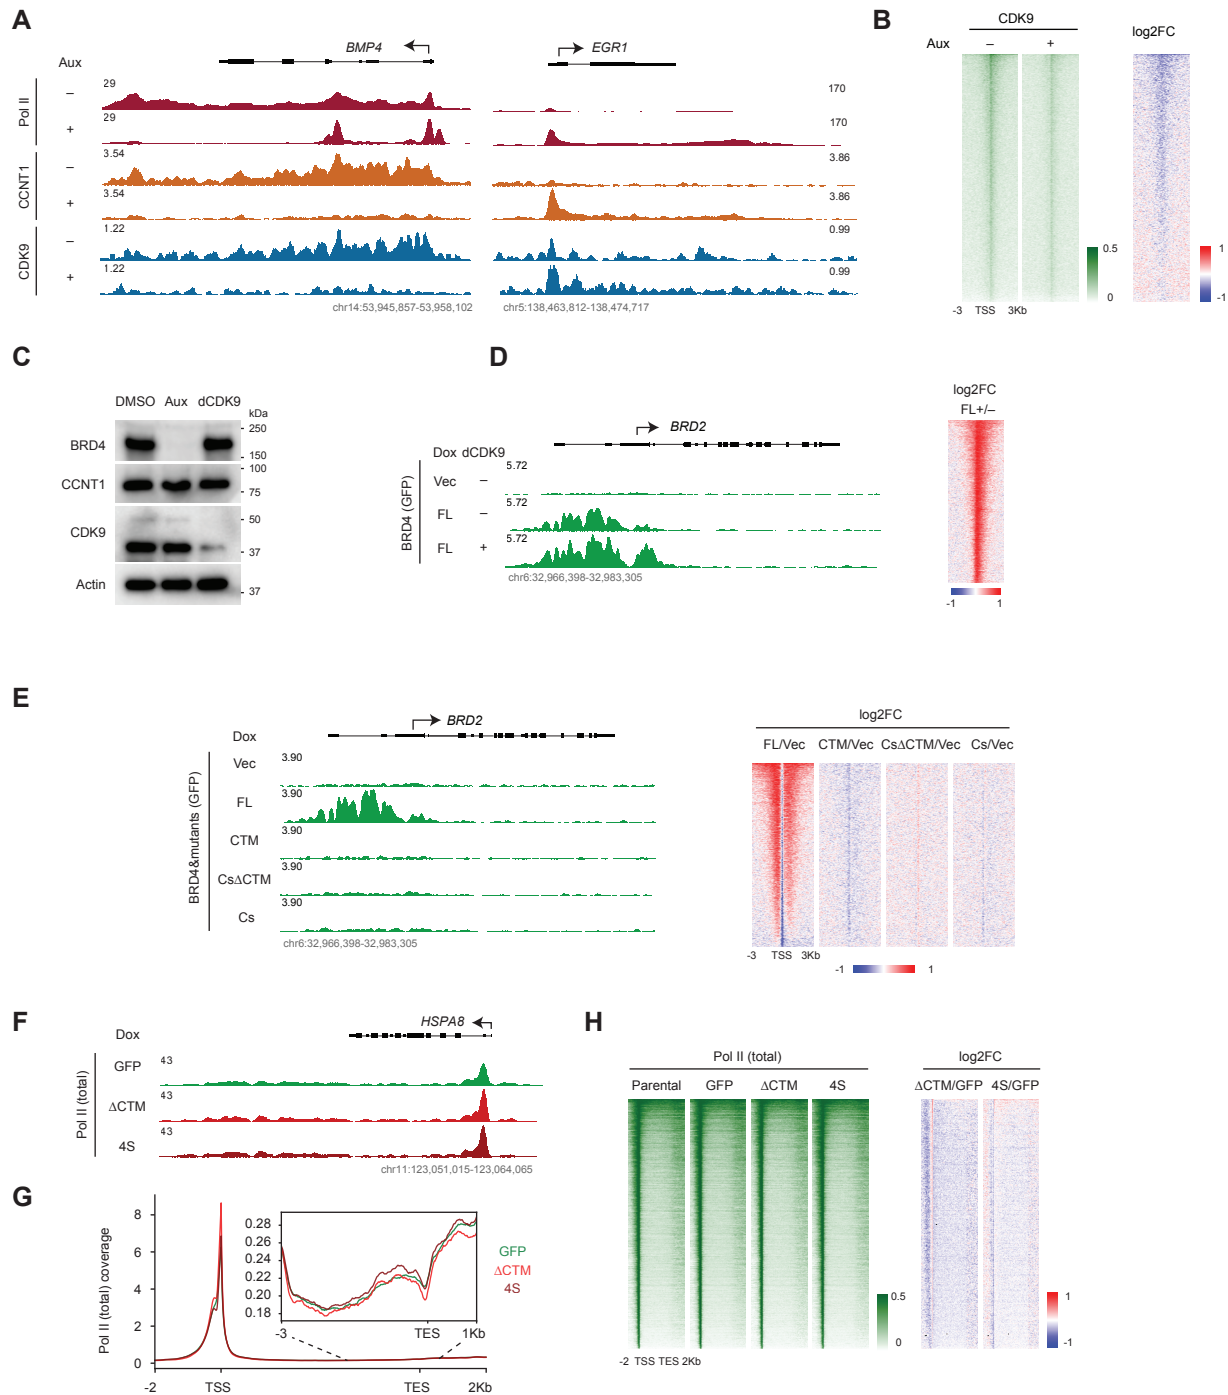

**Figure S5. Genome-wide PTEFb binding relies on BRD4 association with histone acetylation, related to Figure 5**

- A. Track examples comparing the ChIP-seq signals for Pol II, CCNT1 and CDK9 in the same samples of auxin-treated (3h) BRD4-IAA7 cells.
- B. Heatmap showing the genome-wide CDK9 occupancy and the corresponding fold change upon auxin treatment for the condition in A. Genes are ranked by CDK9 signal in control.
- C. Western blot showing stable PTEFb protein levels upon depletion of BRD4 by auxin treatment, and degradation of CDK9 but not CCNT1 or BRD4 upon dCDK9 (2.5uM) treatment for 3h in BRD4-IAA7 cells.
- D. Track examples for GFP ChIP-seq signal at the BRD2 gene locus upon Dox-induced expression of GFP-tagged BRD4-FL with or without dCDK9 treatment (left). Heatmap showing the genome wide GFP-BRD4-FL occupancy fold change upon dCDK9 treatment (right), ranked by GFP signal in the untreated GFP-BRD4-FL condition. Endogenous BRD4 was depleted by auxin treatment for 2h prior to the addition of dCDK9.

- E. Track example for GFP ChIP-seq upon induction of GFP-tagged BRD4-FL or the indicated mutants (left). Heatmap showing the genome-wide fold changes of the GFP-tagged BRD4 FL and mutant constructs relative to the vector (right). The endogenous BRD4 is depleted by auxin treatment for 3h across all samples. Genes ranked by GFP signal in the GFP-BRD4-FL condition.
- F. Track examples of Pol II ChIP-seq signal upon Dox induction for the CTM-less BRD4 mutants. This experiment was carried out concurrently with the rescue experiment in Figure 2. The GFP condition in Figures 2C and 2D was used here as a control.
- G. Metagene plot showing the Pol II occupancy for the conditions in F with a zoom-in view around the TES as a reference point.
- H. Heatmap showing the genome-wide Pol II occupancy profiles and the corresponding fold changes for the conditions in F.

**Figure S6**

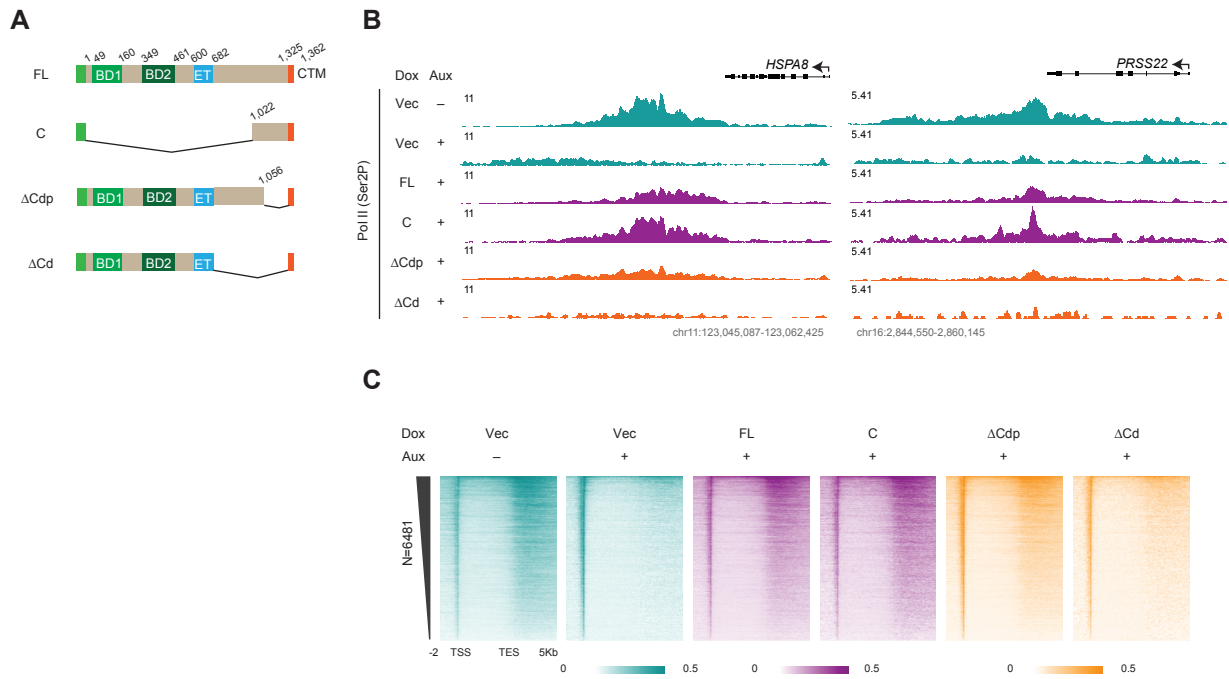

**Figure S6. BRD4 C-terminus stabilizes PTEFb and confers Pol II CDT phosphorylation activity, related to Figure 6**

- A. Schematic of the GFP-tagged BRD4-FL, BRD4-C and two versions of BRD4-ΔCd (partial and total deletion of the C-terminal disordered region).
- B. Track examples of the Ser2P ChIP-seq signal upon BRD4 depletion and rescue by the two versions of BRD4-ΔCd. This experiment was carried out concurrently with the rescue experiment in Figure 4. The Vec  $-/+$  Auxin conditions in Figures 4G and 4H were used here as control.
- C. Heatmap showing the genome-wide Ser2P occupancy for the conditions in B.

**Table S1. Myc-like genes that are rescued by FL but not  $\Delta$ BD, related to Figure 2**

49 genes that met a less stringent cutoff for rescue by FL but not  $\Delta$ BD ( $\log_2$ FC of PRR FLvs $\Delta$ BD  $\geq 0.585$  &  $\log_2$ FC of Pol II occupancy FLvs $\Delta$ BD  $\geq 0.585$ ).

| <b>Gene</b> | <b>ID</b>          | <b>Chr</b> | <b>PRR_log2FLvs<math>\Delta</math>BD</b> | <b>genebody_log2FLvs<math>\Delta</math>BD</b> |
|-------------|--------------------|------------|------------------------------------------|-----------------------------------------------|
| SYT8        | ENSG00000149043.17 | chr11      | 2.159992789                              | 1.783530576                                   |
| CXCL5       | ENSG00000163735.7  | chr4       | 1.487619501                              | 1.567082964                                   |
| ALDH1A3     | ENSG00000184254.17 | chr15      | 0.602975124                              | 1.442493658                                   |
| EN2         | ENSG00000164778.4  | chr7       | 0.705392511                              | 1.214393043                                   |
| VIPR1       | ENSG00000114812.13 | chr3       | 0.913809478                              | 1.17267642                                    |
| MYC         | ENSG00000136997.21 | chr8       | 1.052547361                              | 1.143905835                                   |
| WASHC2A     | ENSG00000099290.17 | chr10      | 0.655929022                              | 1.134605017                                   |
| KRT80       | ENSG00000167767.14 | chr12      | 1.168665542                              | 1.100289237                                   |
| ISOC2       | ENSG00000063241.8  | chr19      | 0.969626351                              | 1.050499384                                   |
| PRSS23      | ENSG00000150687.12 | chr11      | 0.84434861                               | 1.049689133                                   |
| IFT22       | ENSG00000128581.17 | chr7       | 0.908792686                              | 1.005922998                                   |
| NOL6        | ENSG00000165271.17 | chr9       | 0.855300847                              | 0.953015127                                   |
| ALDH1B1     | ENSG00000137124.8  | chr9       | 0.635422187                              | 0.943146854                                   |
| PNPO        | ENSG00000108439.11 | chr17      | 0.676632082                              | 0.86690695                                    |
| CCND1       | ENSG00000110092.4  | chr11      | 0.973576229                              | 0.855707485                                   |
| MRPL15      | ENSG00000137547.9  | chr8       | 0.845082945                              | 0.854861369                                   |
| DBNDD1      | ENSG00000003249.15 | chr16      | 0.790886418                              | 0.845408124                                   |
| LAD1        | ENSG00000159166.15 | chr1       | 0.596866416                              | 0.830407301                                   |
| GDF15       | ENSG00000130513.7  | chr19      | 0.952055912                              | 0.814050263                                   |
| TGFB2       | ENSG00000092969.12 | chr1       | 0.648091982                              | 0.808104192                                   |
| GHDC        | ENSG00000167925.16 | chr17      | 0.857263493                              | 0.803399108                                   |
| DDX21       | ENSG00000165732.14 | chr10      | 0.606893199                              | 0.79778035                                    |
| DDX56       | ENSG00000136271.11 | chr7       | 0.671335409                              | 0.77872959                                    |
| CCDC22      | ENSG00000101997.13 | chrX       | 0.761567567                              | 0.777271586                                   |
| IL36RN      | ENSG00000136695.15 | chr2       | 1.11883623                               | 0.772034937                                   |
| MYB         | ENSG00000118513.20 | chr6       | 0.641361793                              | 0.765698475                                   |
| LGALS3BP    | ENSG00000108679.13 | chr17      | 0.791261752                              | 0.764930551                                   |
| ZNF771      | ENSG00000179965.12 | chr16      | 0.647275294                              | 0.762225414                                   |
| METTL7A     | ENSG00000185432.12 | chr12      | 1.183797176                              | 0.759434901                                   |
| CYP1A1      | ENSG00000140465.15 | chr15      | 1.421527767                              | 0.752769078                                   |
| HMG20B      | ENSG00000064961.19 | chr19      | 0.763469976                              | 0.736173439                                   |
| MCM2        | ENSG00000073111.14 | chr3       | 0.667495869                              | 0.727087531                                   |
| MVB12A      | ENSG00000141971.13 | chr19      | 0.718113228                              | 0.723125337                                   |
| NOLC1       | ENSG00000166197.17 | chr10      | 0.697748882                              | 0.693588451                                   |
| RBBP8NL     | ENSG00000130701.4  | chr20      | 0.604868722                              | 0.679830792                                   |
| CHMP6       | ENSG00000176108.9  | chr17      | 0.627327886                              | 0.679271047                                   |
| SETD1B      | ENSG00000139718.12 | chr12      | 0.806746275                              | 0.677526151                                   |
| MCM5        | ENSG00000100297.16 | chr22      | 0.754325631                              | 0.674936249                                   |
| ALDH7A1     | ENSG00000164904.18 | chr5       | 0.611537845                              | 0.667712821                                   |
| METTL13     | ENSG00000010165.20 | chr1       | 0.934505679                              | 0.653979176                                   |



|         |                    |       |             |             |
|---------|--------------------|-------|-------------|-------------|
| MARC1   | ENSG00000186205.13 | chr1  | 1.172704878 | 0.650556711 |
| GTF3C6  | ENSG00000155115.7  | chr6  | 0.675162347 | 0.649060893 |
| LDHB    | ENSG00000111716.14 | chr12 | 0.614782298 | 0.642948781 |
| BMP4    | ENSG00000125378.16 | chr14 | 0.75936461  | 0.635414596 |
| SNORD82 | ENSG00000115053.17 | chr2  | 0.595052277 | 0.623364254 |
| ANXA1   | ENSG00000135046.14 | chr9  | 1.08246216  | 0.620031844 |
| CDK4    | ENSG00000135446.17 | chr12 | 0.800086922 | 0.620031844 |
| DTD2    | ENSG00000129480.13 | chr14 | 0.64458806  | 0.597664031 |
| DNAL4   | ENSG00000100246.13 | chr22 | 0.592822558 | 0.585036423 |
